# Supplementary material
Source: publisher figshare collection journal article supplement (https://acs.figshare.com/ndownloader/files/4381339)
Supplement: Supplementary file 1 [file 4381339]

# Sedimentation of Polyelectrolyte Chains in Aqueous Solutions

Zhenli Luo<sup>†</sup> and Guangzhao Zhang<sup>\*,†,‡</sup>

<sup>†</sup>*Hefei National Laboratory for Physical Sciences at Microscale, Department of Chemical Physics, University of Science and Technology of China, Hefei, P. R. China 230026*

<sup>‡</sup>*Faculty of Materials Science and Engineering, South China University of Technology, Guangzhou, P. R. China 510640*

## Supporting Information

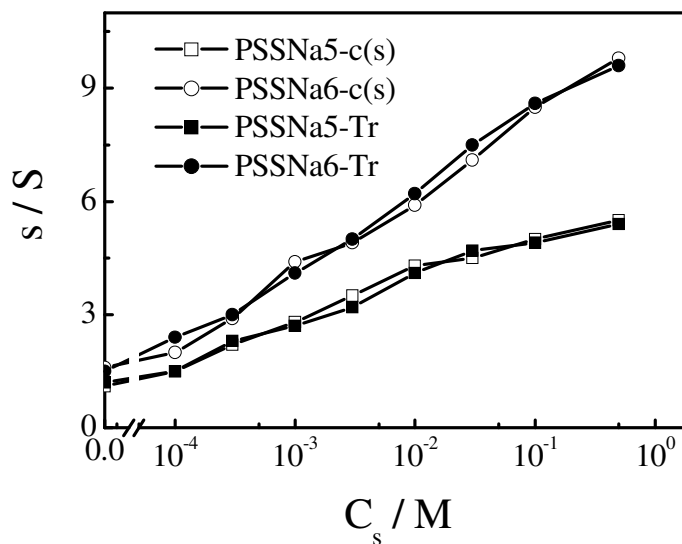

**Figure 1s.** Sedimentation coefficients of PSSNa5 and PSSNa6 in aqueous solutions by c(s) model and Transport model. The PSSNa concentration is 0.10 mg/mL. It shows that the sedimentation coefficients determined by two models are identical.

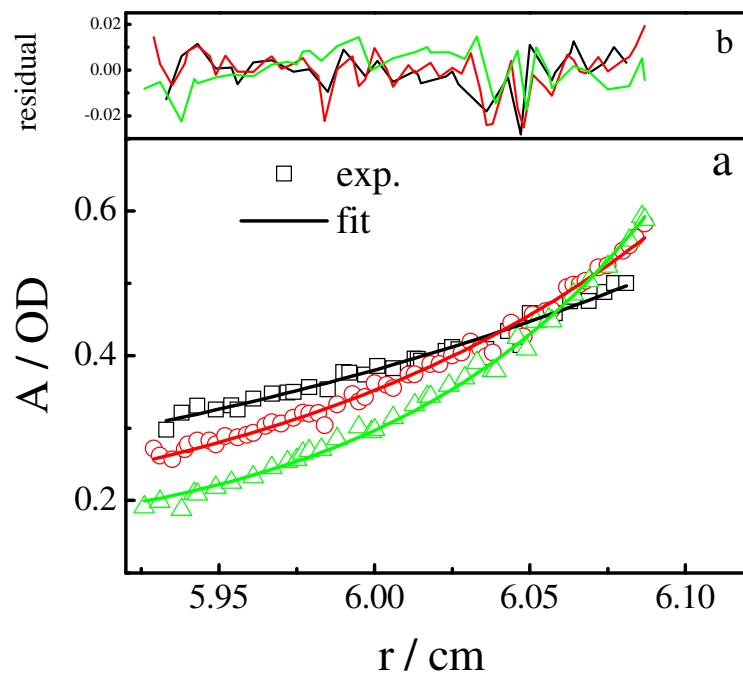

**Figure 2s.** Sedimentation equilibrium (SE) analysis of PSSNa3 at 12000 rpm ( $\square$ ), 16000 rpm ( $\circ$ ) and 20000 rpm ( $\triangle$ ). PSSNa3 concentration ( $C_p$ ) and NaCl concentration ( $C_s$ ) are 0.20 mg/mL and 0.10 M, respectively. (a) The collected data (discrete points) and fit data (solid line); (b) Fit residual.

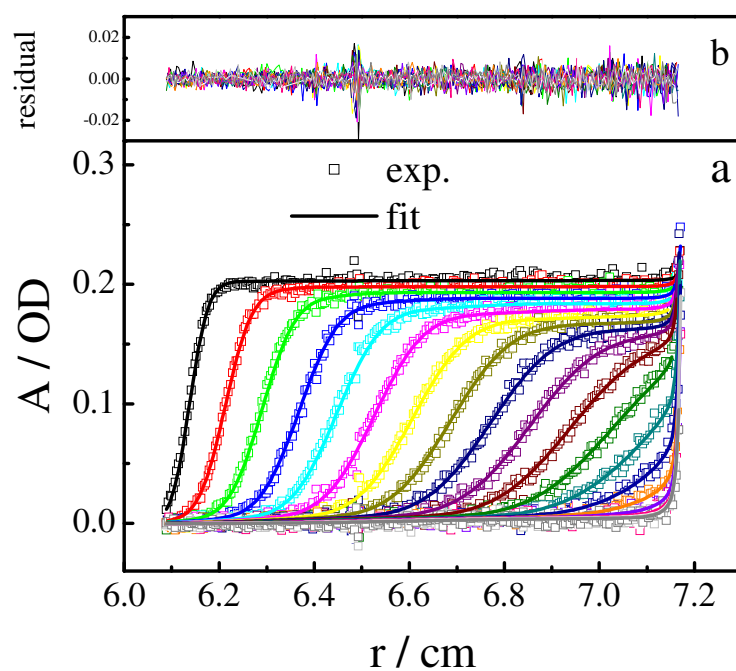

**Figure 3s.** Sedimentation velocity (SV) analysis of PSSNa3 (every 5th scan loaded). Data were recorded at 260 nm. PSSNa3 concentration and NaCl concentration are 0.10 mg/mL and 0.10 M, respectively. (a) The collected data (discrete points) and fit data (solid line); (b) Fit residual.

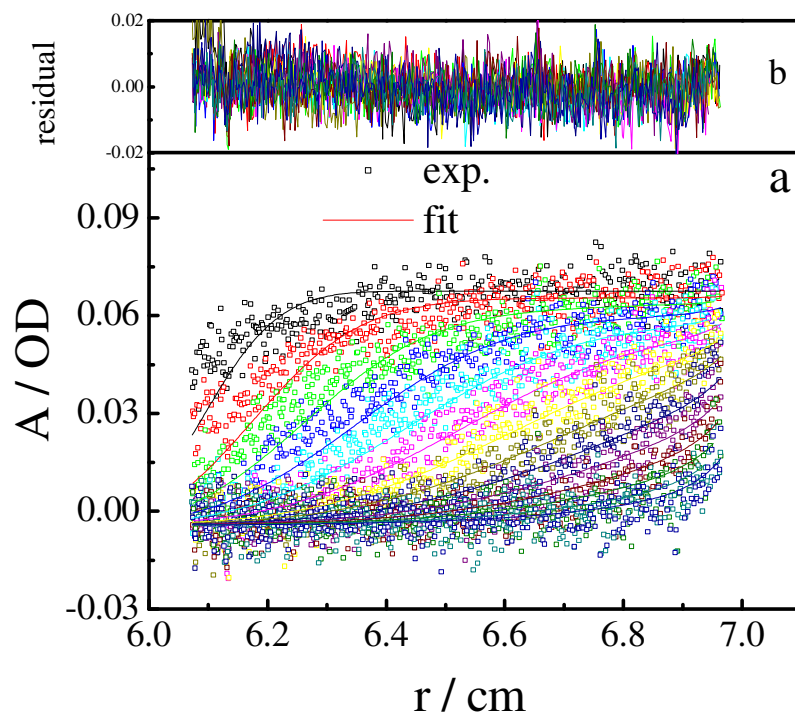

**Figure 4s.** Sedimentation velocity (SV) analysis of PSSNa3 in water (every 6th scan loaded). Data were recorded at 225 nm. PSSNa3 concentration is 0.0015 mg/mL. (a) The collected data (discrete points) and fit data (solid line); (b) Fit residual.

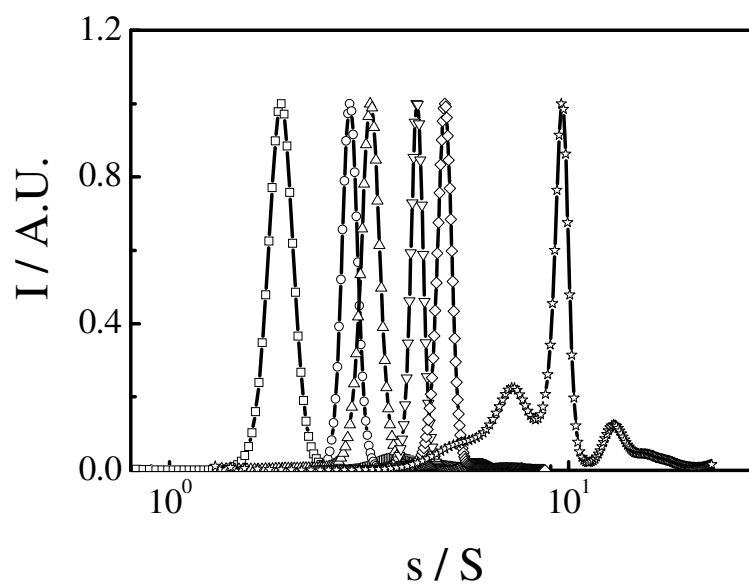

**Figure 5s.** Sedimentation coefficient ( $s$ ) distributions of PSSNa1 to PSSNa6 (from left to right). PSSNa concentration ( $C_p$ ) and NaCl concentration ( $C_s$ ) are 0.10 mg/mL and 0.10 M, respectively.
